# Supplementary material for: Targeted inhibition of β-catenin alleviates airway inflammation and remodeling in asthma via modulating the profibrotic and anti-inflammatory actions of transforming growth factor-β1
Source: PubMed Central journal article supplement — Ther Adv Respir Dis. 2021 Feb 2;15:1753466620981858. doi: 10.1177/1753466620981858 (PMC7970683; doi:10.1177/1753466620981858), 2021-02-02
Supplement: sj-pdf-1-tar-10.1177_1753466620981858.pdf [file sj-pdf-1-tar-10.1177_1753466620981858.pdf]

## Author Response 1

1. We added a reference about the reason of choosing this dose of drug.

The instruction of ICG001 indicated that ICG-001 (5 $\mu$ M) inhibits leptin-induced EMT in MCF7 cell [Yan D, et al, Leptin-induced epithelial-mesenchymal transition in breast cancer cells requires  $\beta$ -catenin activation via Akt/GSK3- and MTA1/Wnt1 protein-dependent pathways. *J Biol Chem*, 2012, 287(11), 8598-8612]. ICG-001 (5 mg/kg per day) significantly inhibits beta-catenin signaling in mice, while concurrently preserving the epithelium [Henderson WR Jr, et al, Inhibition of Wnt/beta-catenin/CREB binding protein (CBP) signaling reverses pulmonary fibrosis. *Proc Natl Acad Sci USA*, 2010, 107(32), 14309-14314]. On the basis of instruction, in our previous study, we find the most safe and effective dosage of ICG001 through comparative experiments.

2. It has been modified in our revised manuscript.

3. It has been modified in our revised manuscript.

4. We have revised this sentence.

5. It has been modified in our revised manuscript.

6. It has been modified in our revised manuscript.

7. We recorded and compared each animal's respiratory rate, weight, fur and general status, and then draw the conclusions.

8. It has been modified in our revised manuscript.

9. It has been modified in our revised manuscript.

10. We have provided a reference.

11. It has been modified in our revised manuscript.

12. It has been modified in our revised manuscript.
