# Supplementary material for: Targeted inhibition of β-catenin alleviates airway inflammation and remodeling in asthma via modulating the profibrotic and anti-inflammatory actions of transforming growth factor-β1
Source: PubMed Central journal article supplement — Ther Adv Respir Dis. 2021 Feb 2;15:1753466620981858. doi: 10.1177/1753466620981858 (PMC7970683; doi:10.1177/1753466620981858), 2021-02-02
Supplement: sj-pdf-2-tar-10.1177_1753466620981858.pdf [file sj-pdf-2-tar-10.1177_1753466620981858.pdf]

## Author Response 2

### Major points :

1. According to your advice, we add IL-4, IL-5 and IgE levels in BALF in our revised manuscript.
2. In our previous study[Xinrui Tian, Jianlin Zhang, Thian Kui Tan, J. Guy Lyons, Hong Zhao, Bo Niu, So Ra Lee, Tania Tsatralis, Ye Zhao, Ya Wang, Qi Cao, Changqi Wang, Yiping Wang, Vincent W. S. Lee, Michael Kahn, Guoping Zheng, and David C. H. Harris. Association of  $\beta$ -catenin with P-Smad3 but not LEF-1 differentiates in vitro profibrotic and anti-inflammatory effects of TGF- $\beta$ 1. *J Cell Sci.* 2012, 126: 67-76.], we found that TGF- $\beta$ 1 increased the cytosolic  $\beta$ -catenin. Target inhibiting  $\beta$ -catenin can reduce the increase of cytosolic  $\beta$ -catenin in TGF- $\beta$ 1-treated cells (Fig. 1). The conclusion of  $\beta$ -catenin induction by TGF- $\beta$ 1 is cited in our revised manuscript.

Fig1. Western blot analysis of  $\beta$ -catenin levels in cytoplasmic fraction extracted from C1.1

cells untreated, or treated with TGF- $\beta$ 1 (3 ng/ml) for 24 hours and transfected with vector control (pcDNA3) or F-TrCP-Ecad, or transfected with F-TrCP-Ecad alone.

3. We mentioned the opposite results of Wnt/ $\beta$ -catenin affecting airway inflammation in the discussion part.

### Minor:

1. We add EMT target genes snail, slug in our revised manuscript.
2. We add MMP-9 mRNA expression in in vivo experiment.
3. We recorded and compared each animal's respiratory rate, weight, fur and general status, and then draw the conclusions. Symptoms were less prominent in the ICG001 or budesonide treatment group rats than model group rats. And no symptoms were observed in the control group rats.
4. It has been modified in our revised manuscript.
5. We added more literature in our revised manuscript.
6. It has been modified in our revised manuscript.
7. It has been modified in our revised manuscript.
8. It has been modified in our revised manuscript.
